# Supplementary material for: Calotropis gigantea Assisted Synthesis of Zinc Oxide Nanoparticle Catalysis: Synthesis of Novel 3‐Amino Thymoquinone Connected 1,4‐Dihyropyridine Derivatives and Their Cytotoxic Activity
Source: Hindawi journal article supplement (doi:10.1155/2022/9697057), 2022-01-01

**Supplementary Information**

**Calotropis Gigantea assisted synthesis of Zinc Oxide Nanoparticles catalysis: Synthesis of novel 3-amino thymoquinone connected 1,4-dihyropyridine derivatives and their cytotoxic activity**

PerumalGobinath1,PonnusamyPackialakshmi1, Ashraf Atef Hatamleh2, Munirah Abdullah Al-Dosary2, Yasmeen Abdualrhman Al-Wasel2, Ravindran Balasubramani3,AkbarIdhayadhulla*, and RadhakrishnanSurendrakumar*1

CONTENT PAGE. NO

1H NMR 2-11

13C NMR 12-21

compound- 1a


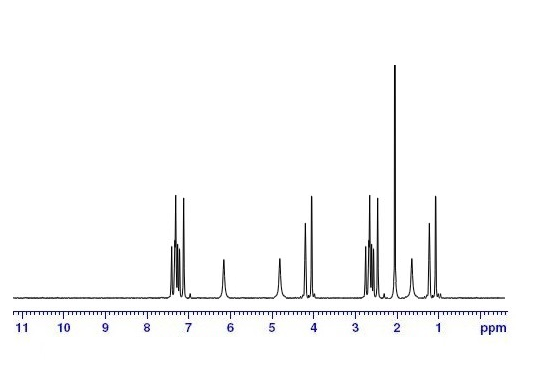


Compound- 1b


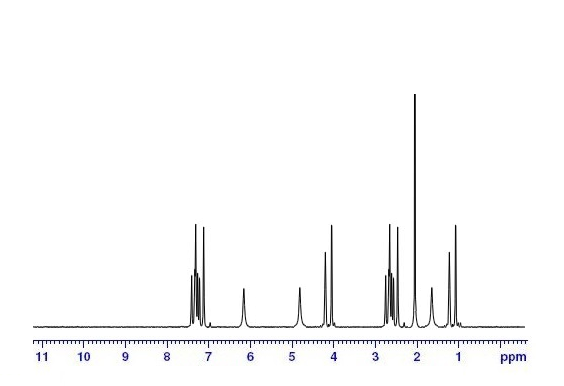


Compound- 1c


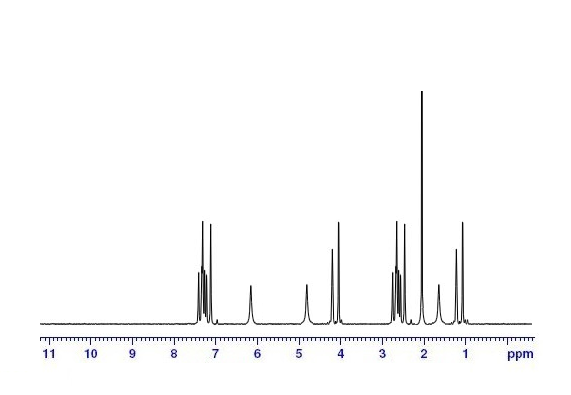


Compound- 1d


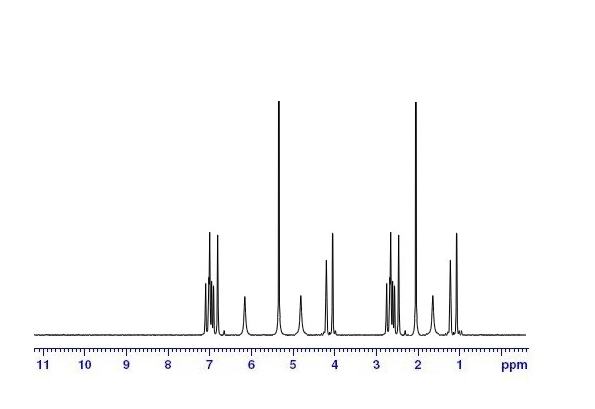


Compound-1e


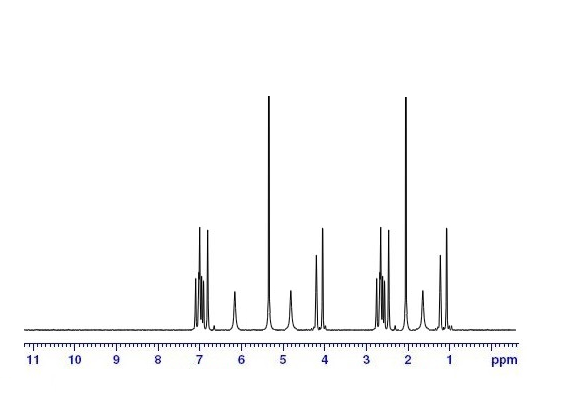


Compound-1f


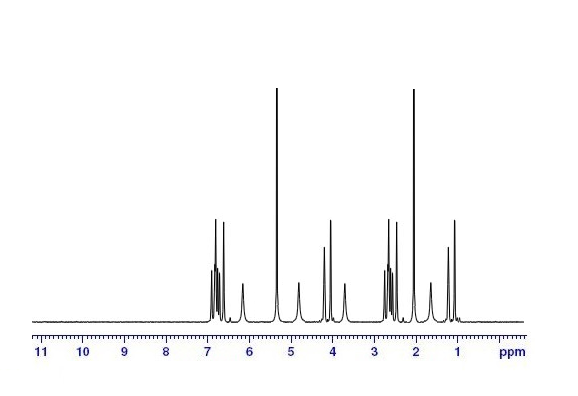


Compound- 1g


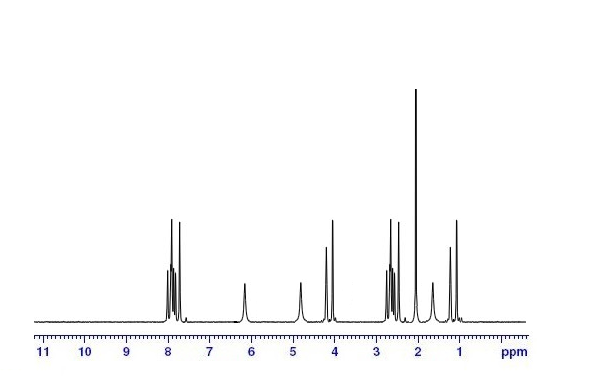


Compound- 1h


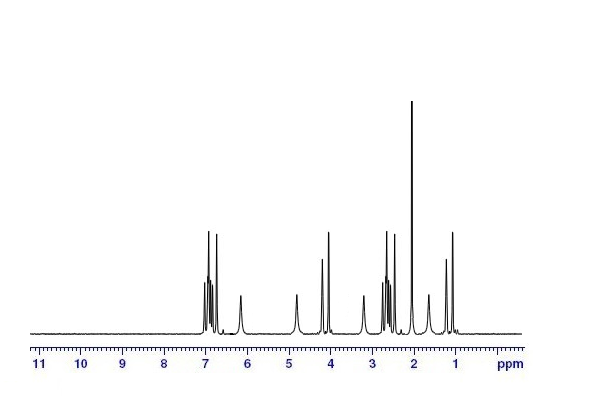


Compound- 1i


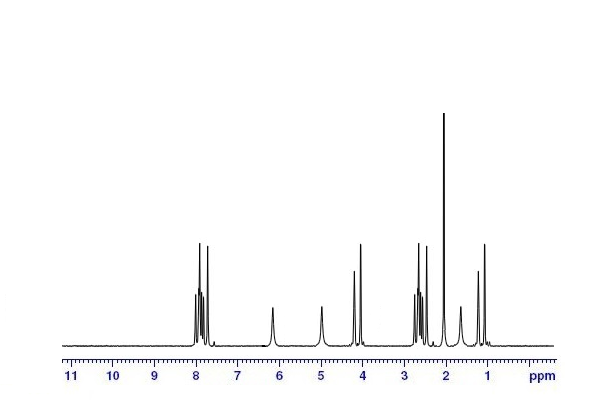


Compound- 1j


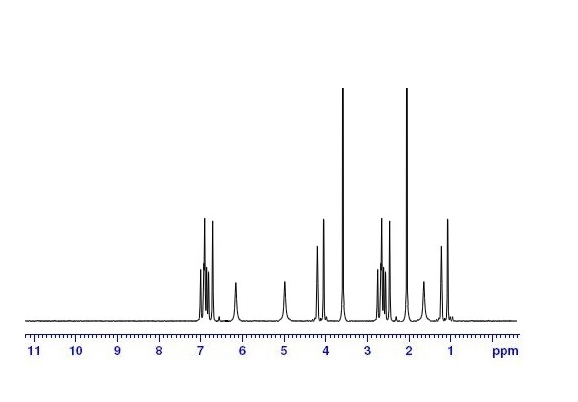


13C-NMR Spectra

Compound-1a


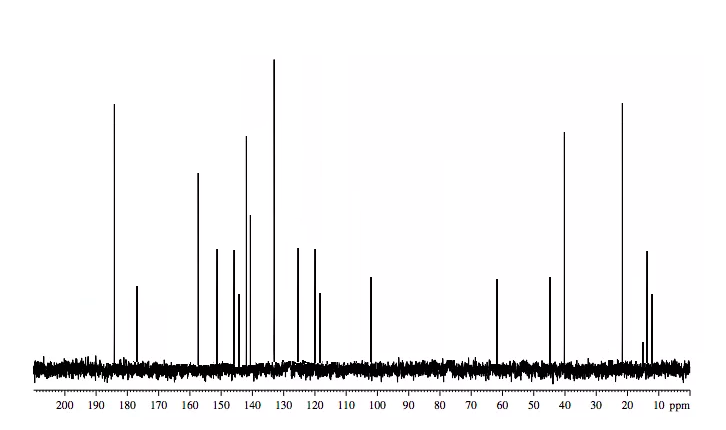


Compound-1b


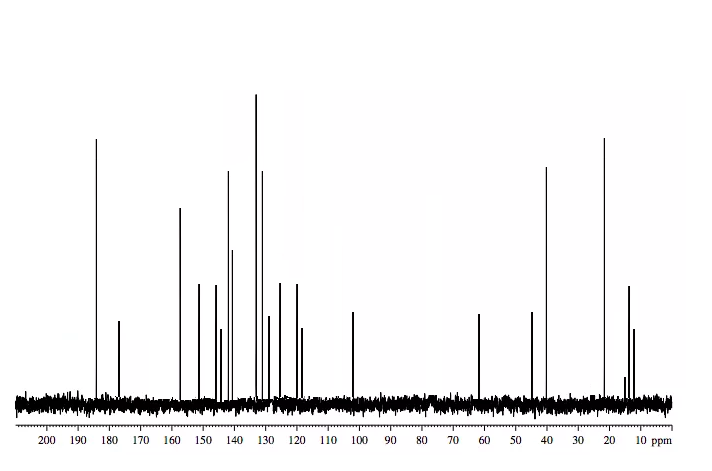


Compound-1c


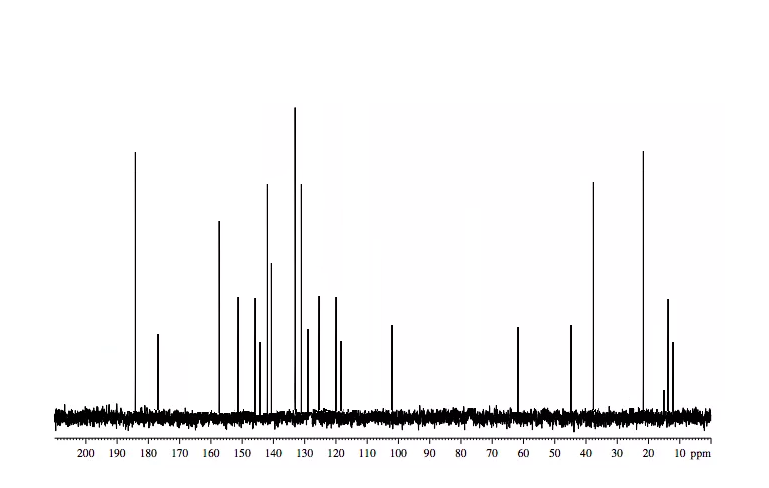


Compound-1d


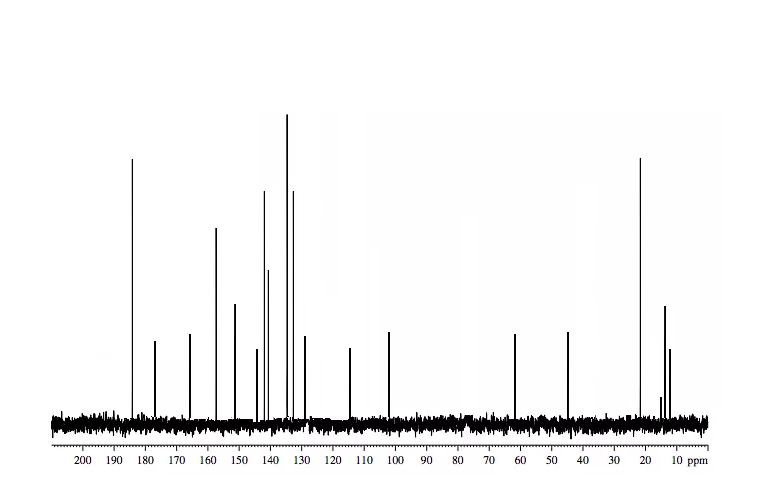


Compound-1e


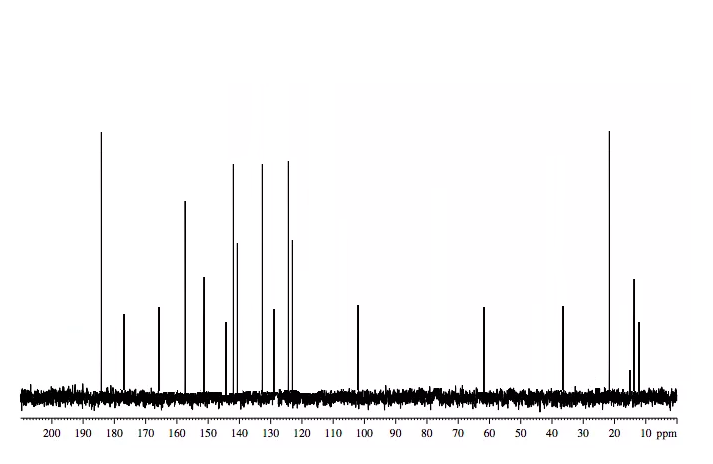


Compound-1f


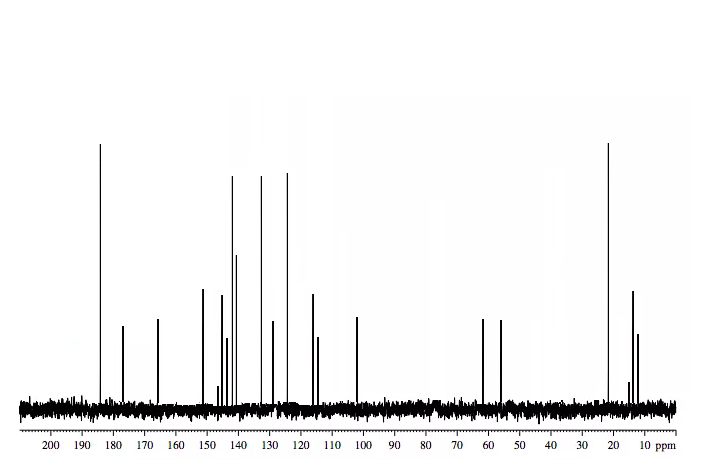


Compound-1g


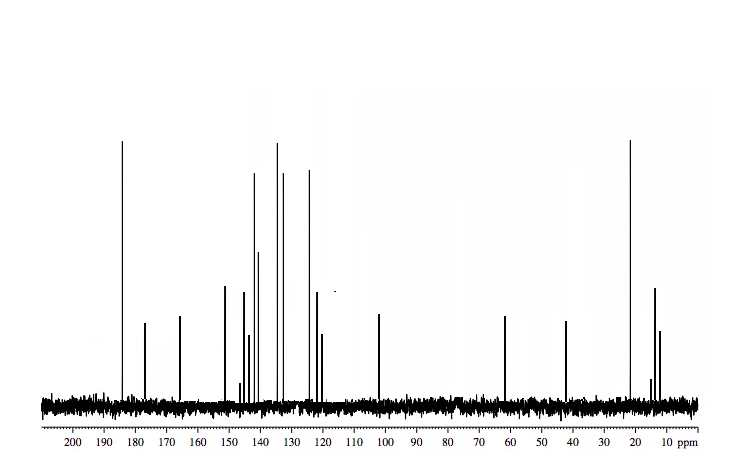


Compound-1h


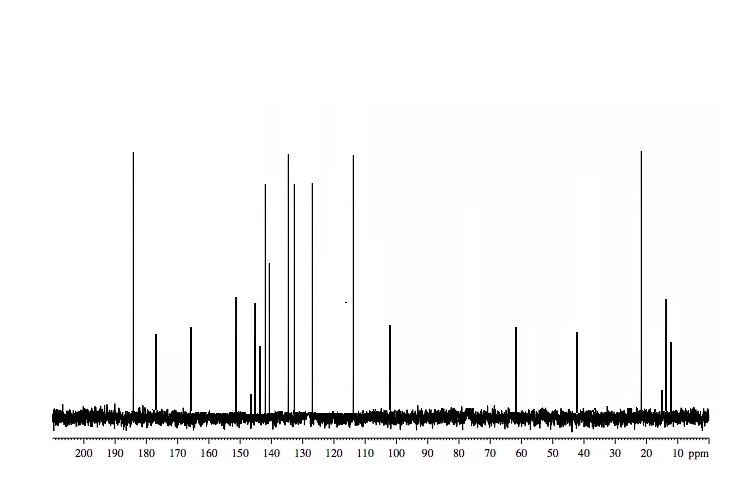


Compound-1i


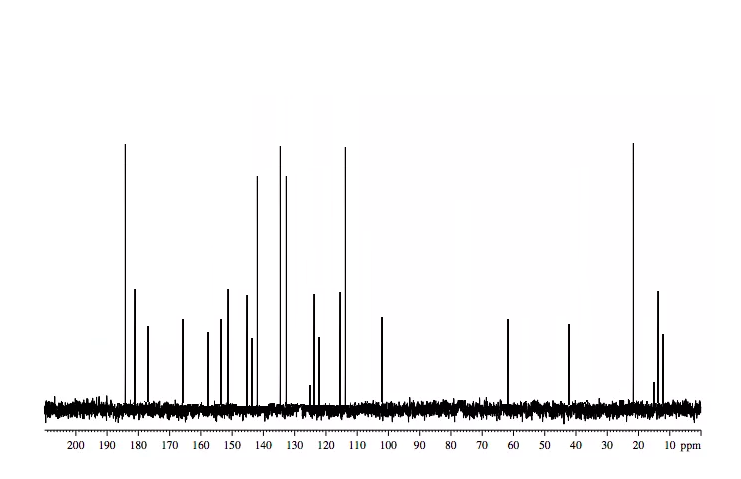


Compound-1j


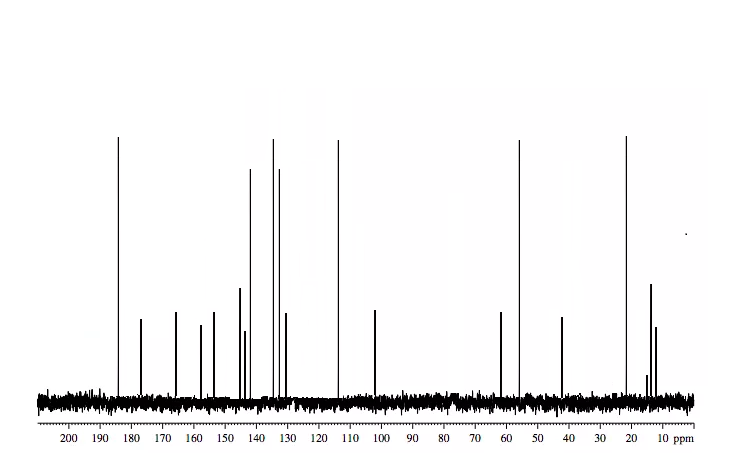

Supplement: f1 [file 9697057.f1.doc]
